# Supplementary material for: Research on the correlation between activating transcription factor 3 expression in the human coronary artery and atherosclerotic plaque stability
Source: Springer Nature journal article supplement (doi:10.1186/s12872-021-02161-9), 2021-07-28

Fig 2. A

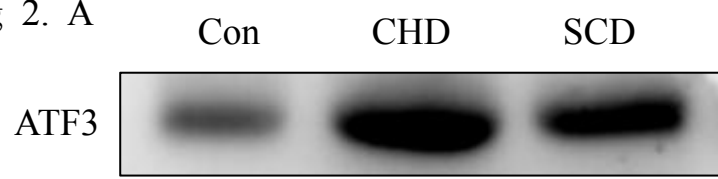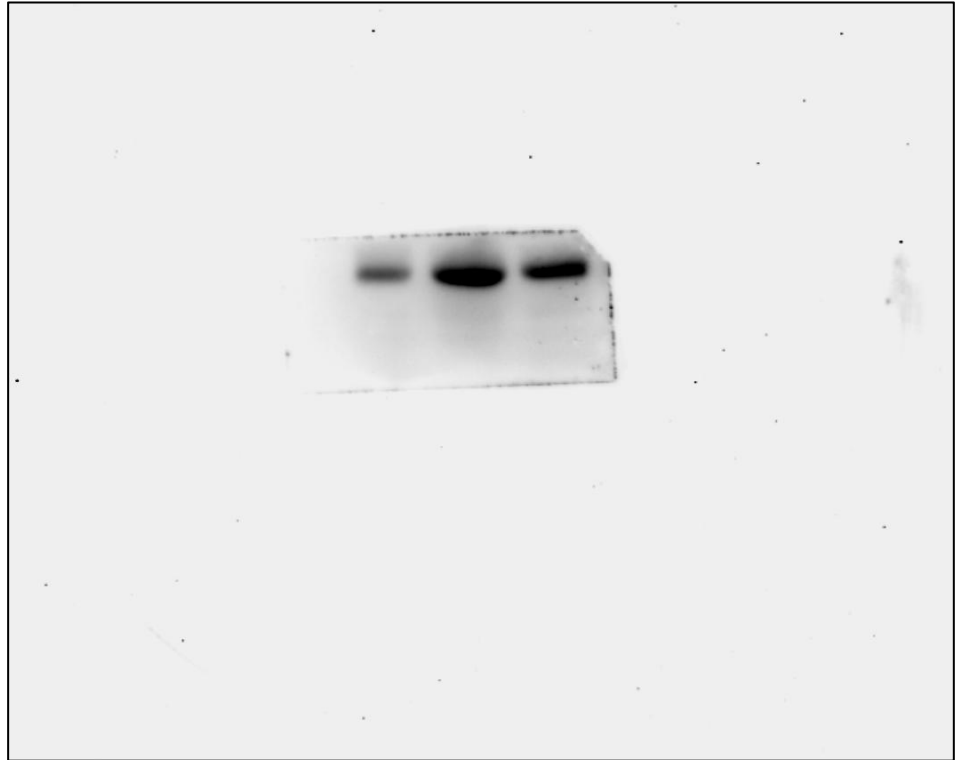

Fig 2. A

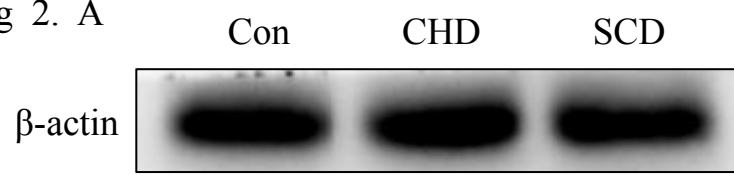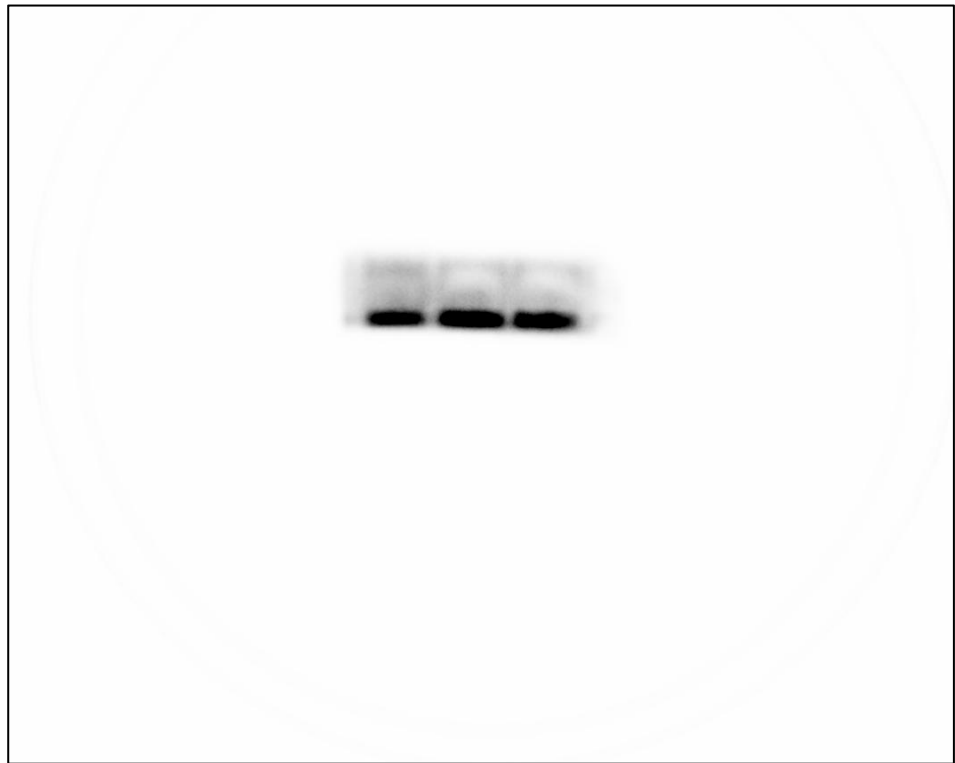

Fig 3. A

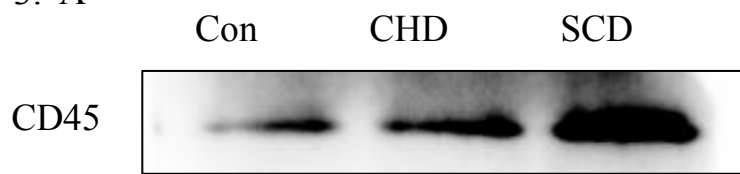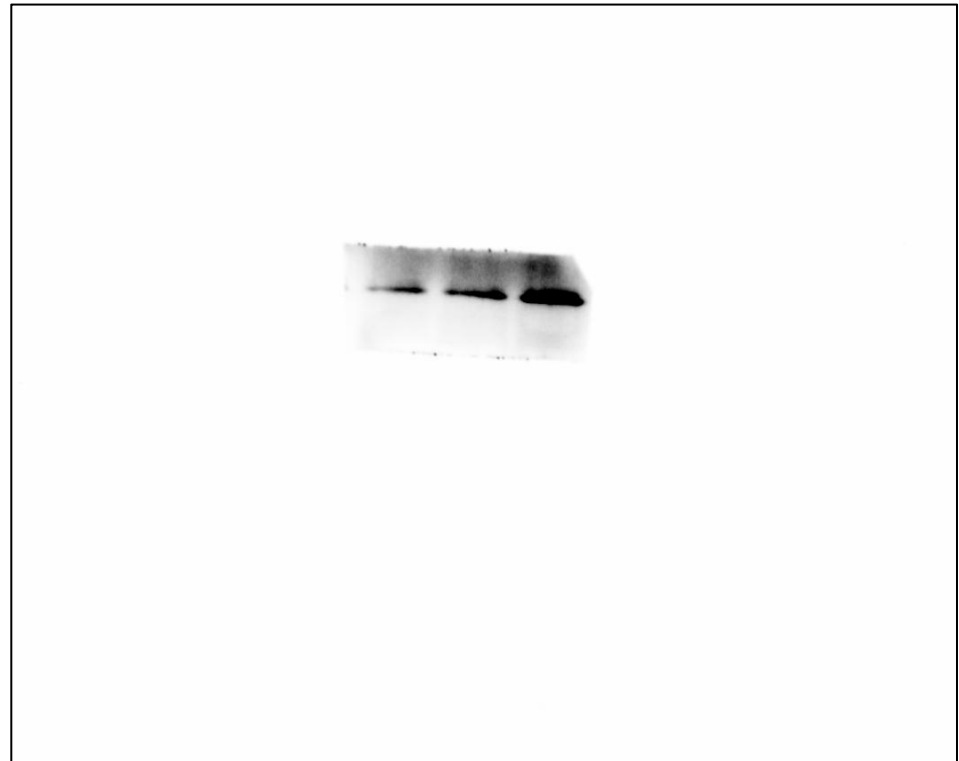

Fig 3. A

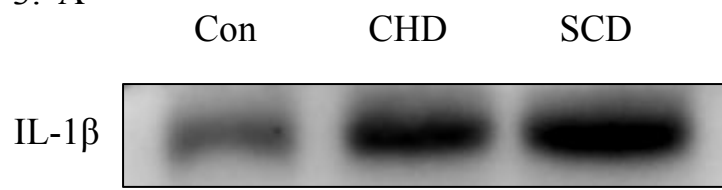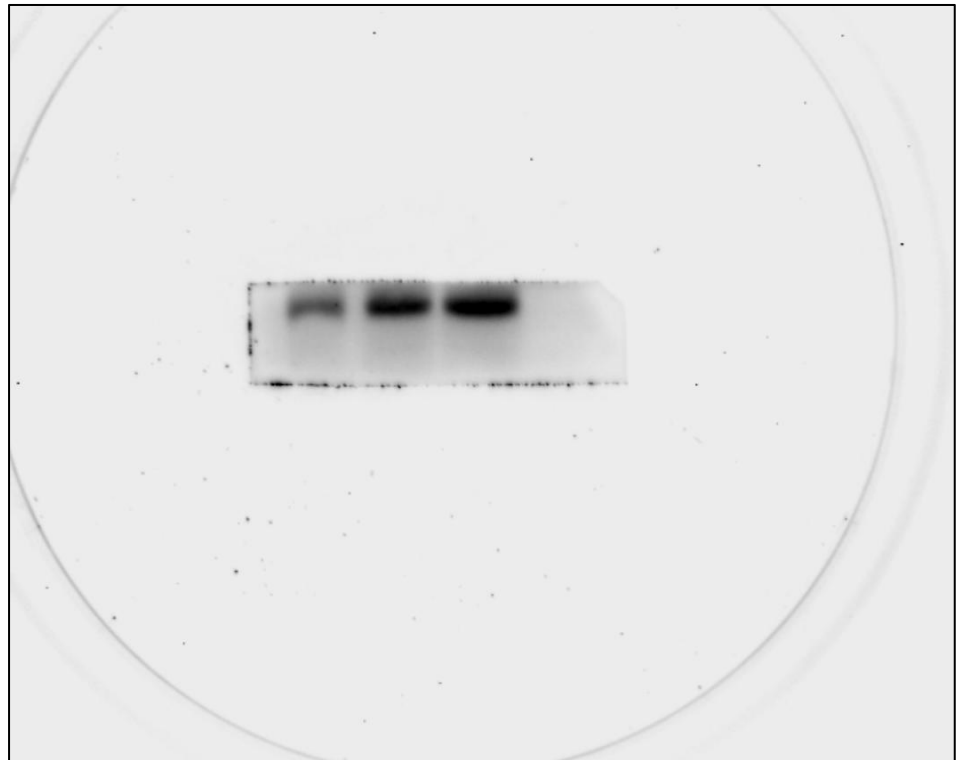

Fig 3. A

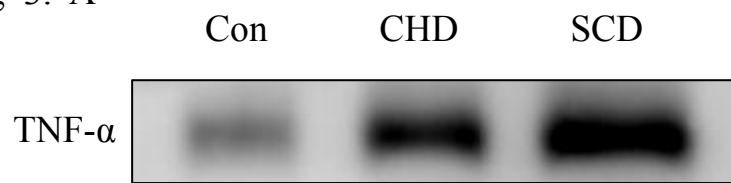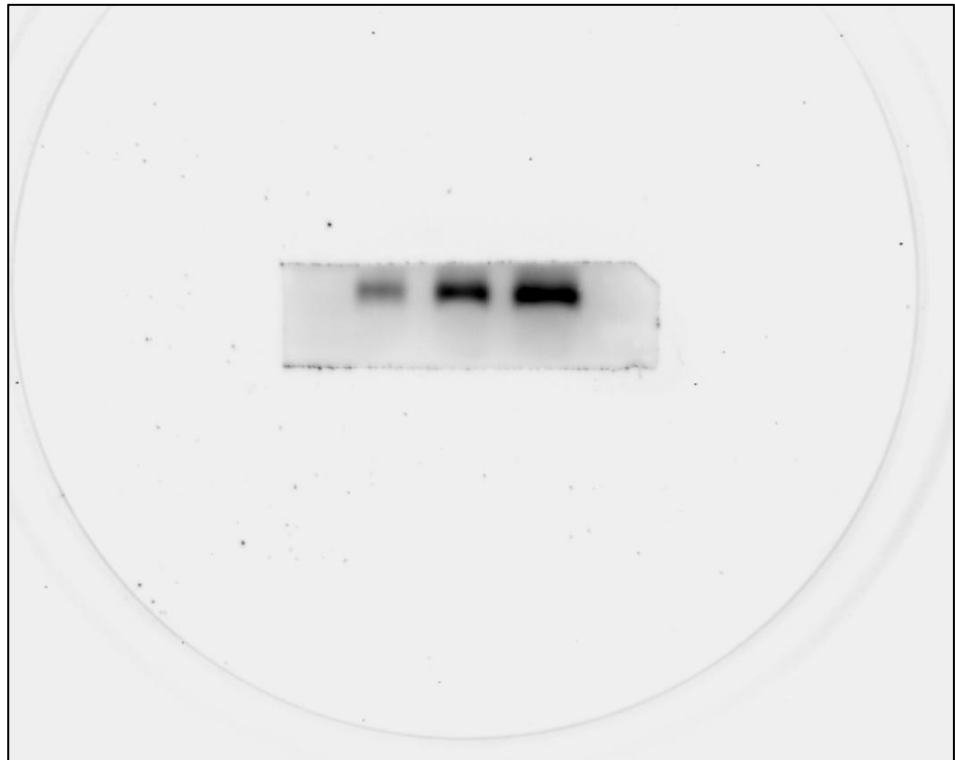

Fig 3. A

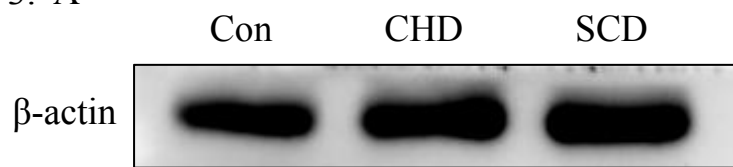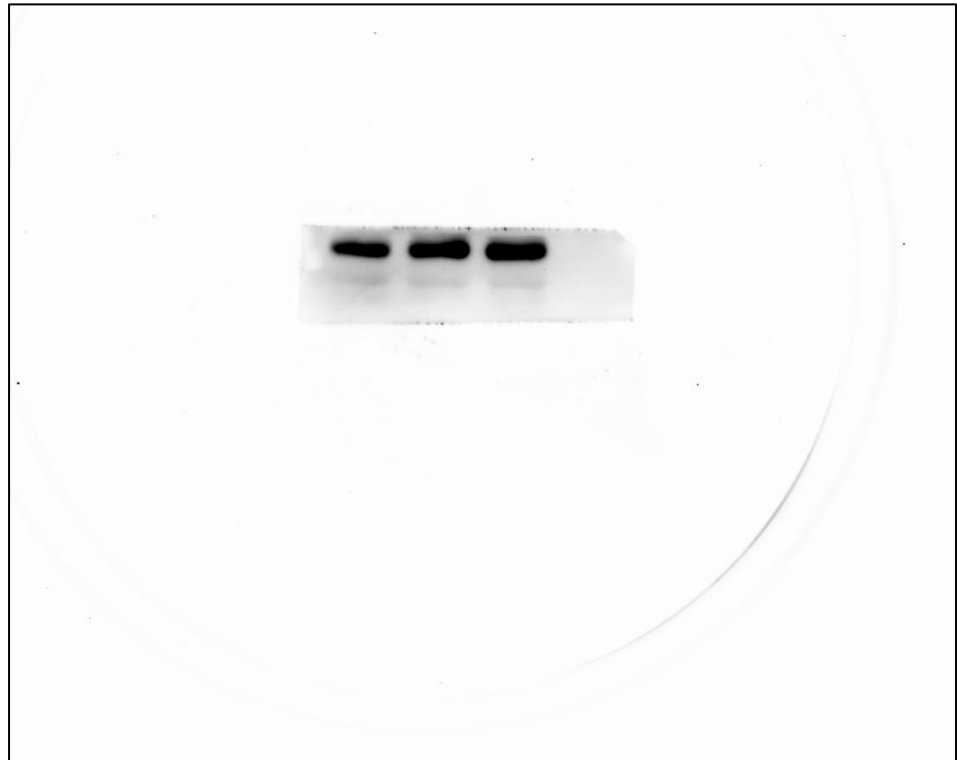

Fig 4. A

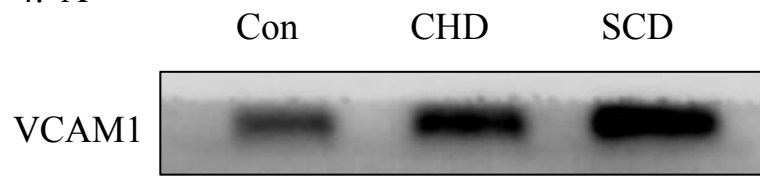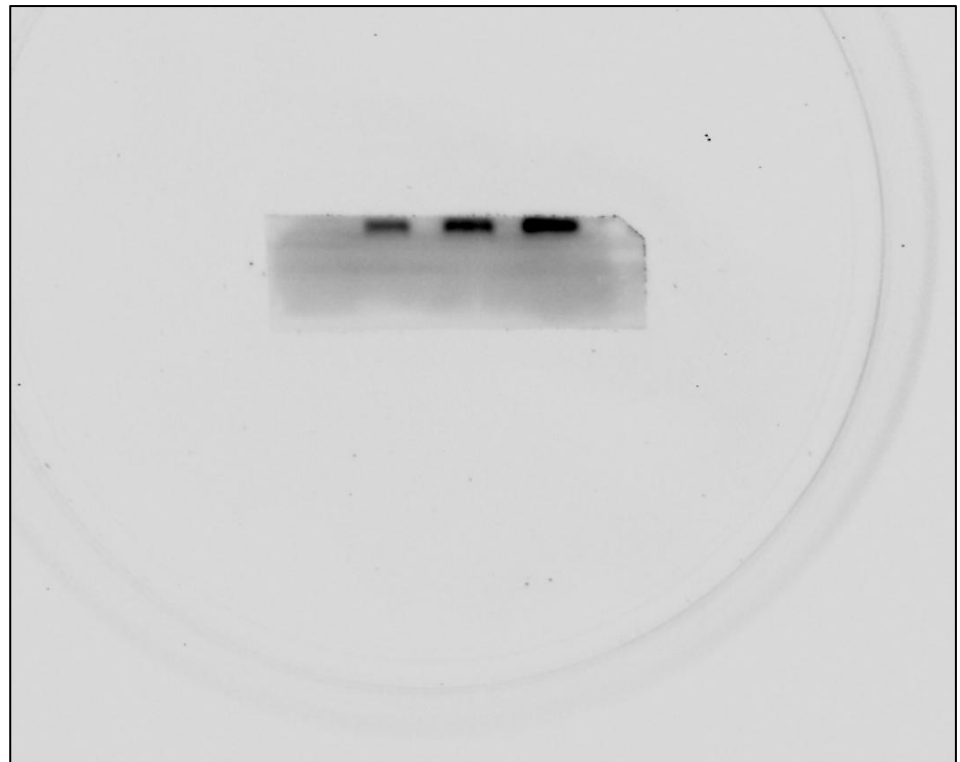

Fig 4. A

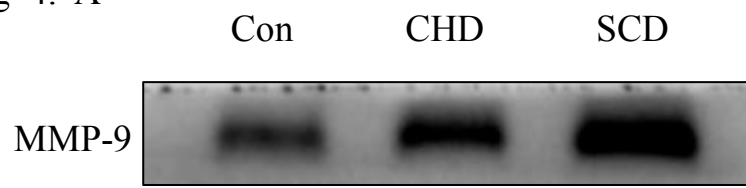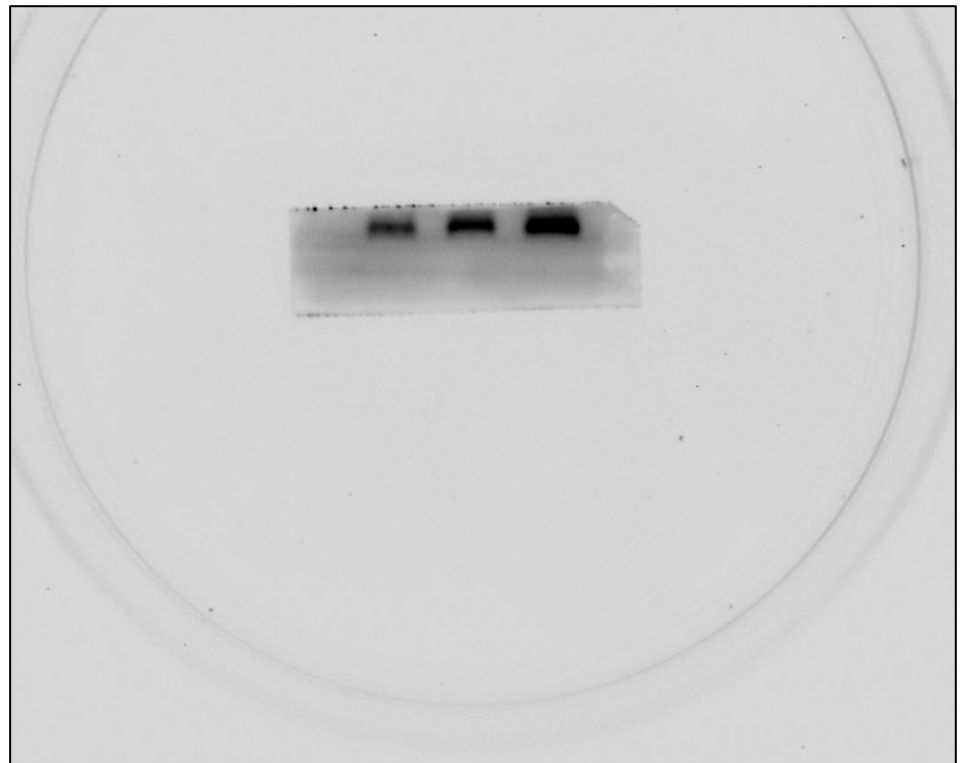



Fig 4. A

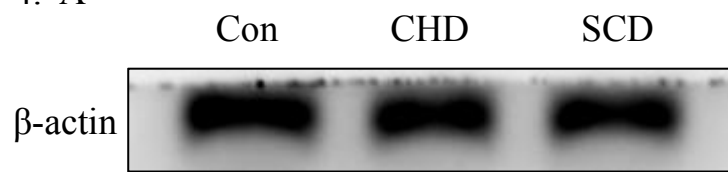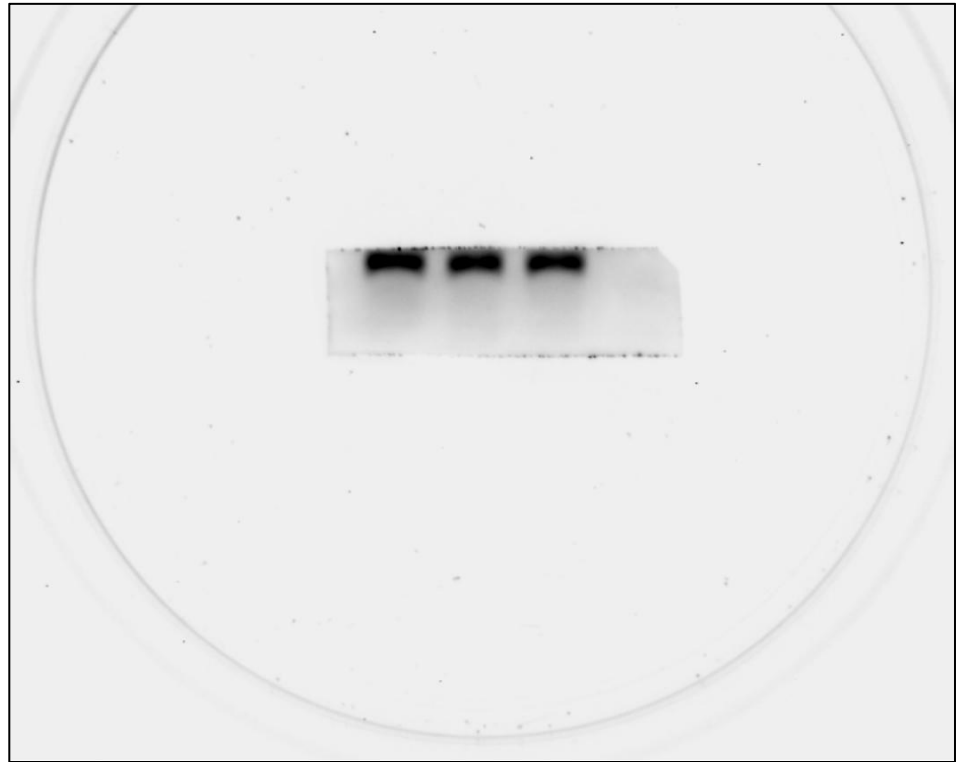

Supplement: MOESM2 [file 19399918]
